# Supplementary material for: Sex-heterogeneous SNPs disproportionately influence gene expression and health
Source: PubMed Central journal article supplement (PMC9070888; doi:10.1371/journal.pgen.1010147), 2022-05-05
Supplement: pgen.1010147.s001.pdf [file pgen.1010147.s001.pdf]

## URLs

**METASOFT** meta-analysis software - <http://genetics.cs.ucla.edu/meta/>

**METAL** meta-analysis software -  
[https://genome.sph.umich.edu/wiki/METAL\\_Documentation](https://genome.sph.umich.edu/wiki/METAL_Documentation)

**PLINK** clumping software - <https://www.cog-genomics.org/plink/>

**ANNOVAR** annotation software - <https://annovar.openbioinformatics.org/en/latest/>

**PANTHER** - ORA software - <http://www.pantherdb.org>

**Baseline annotations** - [https://storage.googleapis.com/broad-alkesgroup-public/LDSCORE/readme\\_baseline\\_versions](https://storage.googleapis.com/broad-alkesgroup-public/LDSCORE/readme_baseline_versions)

**meQTLs** - <http://www.mqtl.db.org>

**PrediXcan** predicted gene expression software -  
<https://github.com/hakyimlab/PrediXcan>

## Disease and health related trait GWAS for enrichment analysis:

**Psychiatric Genomics Consortium (PGC)** - <https://www.med.unc.edu/pgc/download-results/>

**Adult-onset of asthma** -  
[https://genepi.qimr.edu.au/staff/manuelF/gwas\\_results/main.html](https://genepi.qimr.edu.au/staff/manuelF/gwas_results/main.html)

**Chronic kidney disease (CKD)** - <http://ckdgen.imbi.uni-freiburg.de>

**Cardiovascular Disease Knowledge Portal** - <http://www.broadcvdi.org/>

**Insomnia** - [https://ctg.cncr.nl/software/summary\\_statistics](https://ctg.cncr.nl/software/summary_statistics)

**Late-onset Alzheimer disease** - <https://www.niagads.org/home>

**Type 2 diabetes** - <http://cnsgenomics.com/data.html>

**Age at completed education/ Overall health** - <http://www.nealelab.is/uk-biobank/ukbround2announcement>

**Sociodemographic traits** - <https://www.thessgac.org/data>  
Intelligence - <https://ctg.cncr.nl>

**Global Lipids Genetics Consortium -**

<http://www.sph.umich.edu/csg/abecasis/public/lipids2013>

**Birthweight -** <https://egg-consortium.org/>
